# Supplementary figures and images for: A new colorimetric aptasensor for paraquat detection based on the designed aptamer with multiple paraquat binding sites in combination with gold nanoparticles
Source: Royal Society of Chemistry journal article supplement (doi:10.1039/d4ay00053f), 2024-01-01

## Supplementary information

**Fig. S1.** The structures of the tested herbicides in this study.

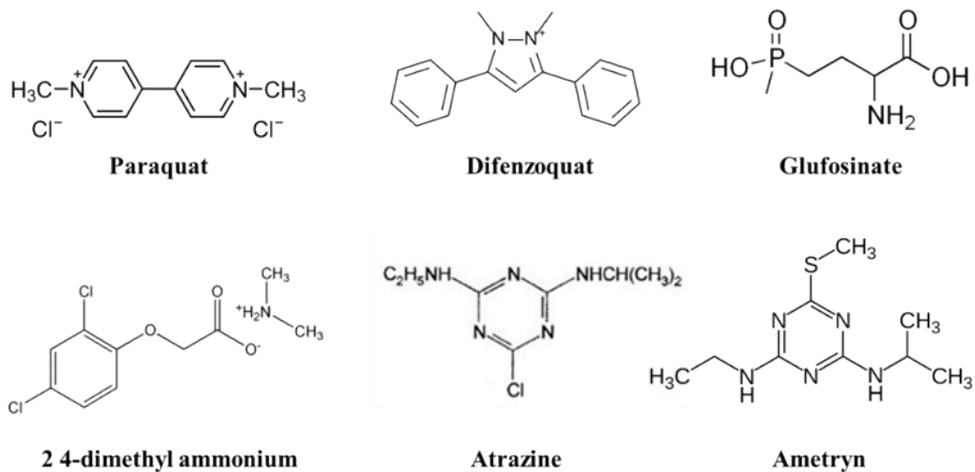

Supplement: d4ay00053f1.pdf [file d4ay00053f1.pdf]
